# Supplementary material
Source: publisher figshare collection journal article supplement (https://geolsoc.figshare.com/ndownloader/files/14340359)
Supplement: Supplementary file 1 [file 14340359]

## Sheet: Melange
Sample	NZ13-331	NZ13-336	NZ13-339	NZ13-120	NZ13-121	NZ13-123		N13 360
GPS	S40 74767 E173 93548	S40 75506 E173 92807	S40 74704 E173 93179	S45 37756 E168 11648	S45 36153 E168 13091	S45 36195 E168 13211		S45 10724 E173 63553
Setting/lithology	hard argillite, in contact with lava	calc. red mudstone	Red mudstone	Red mudstone	Grey mudstone	Dark mudstone		Dark indurated argillite
Location	Swamp Bay, D'Urville Is.	D'Urville Is.	Swamp Bay	Base of intact sequence, Bald Hill	Base of intact sequence, Bald Hill	Base of intact sequence, Bald Hill		Goat Hill area
Stratigraphy	Patuki Melange	Patuki Melange	Patuki Melange	Patuki Melange	Patuki Melange	Patuki Melange		Croissiles Melange
Ba	51	64	137	182	123	399		51
Be	2	3	1					1
Co	50.6	27.6	17.6	12.1	20.8	15.8		28.9
Cs	0.1	0.1	1.6	3.4	4.8	5.2		0.6
Ga	17.2	22	18.7	11.8	12.6	17.9		17.5
Hf	4.9	6.6	5.6	3.7	3.7	4.2		3.2
Nb	42.2	12	8.5	5.8	3.3	8.1		3.8
Rb	1.3	3.5	40.3	51.2	62.6	98.7		3
Sn	2	3	3	2	1	2		1
Sr	302.2	327.1	134.3	144.7	144.2	129.6		662.7
Ta	4.9	2.4	1.5	1.1	0.4	0.7		2.7
Th	3.2	0.2	10.4	7.5	3.3	8.5		2.3
U	0.6	0.2	3	1.9	0.4	1.8		0.9
V	281	193	124	60	106	139		293
W	188.6	132.3	60	95.8	16.7	9.1		172.6
Zr	234.8	242.1	198.9	149.3	136.5	153.2		113.1
Y	32.9	104.7	25	21.1	23.9	26.9		25.2
La	34.7	16.2	28.5	20.8	18.3	25.1		10.9
Ce	62.3	52.6	65.3	47.1	40.4	51.8		27.5
Pr	7.78	8.88	6.82	5.16	4.64	6.29		3.46
Nd	34.3	49.7	25.9	18	19.1	23.7		16.6
Sm	6.5	14.57	5.67	4.18	4.2	5.58		4.1
Eu	2.29	3.86	1.06	1.01	1.09	1.16		1.37
Gd	6.65	18.16	4.96	4.15	4.24	5.05		4.7
Tb	1.02	3.14	0.77	0.64	0.71	0.87		0.81
Dy	6.34	19.33	5	4.04	4.35	4.8		4.77
Ho	1.21	3.97	1	0.82	0.89	1.04		0.98
Er	3.42	11.27	2.64	2.23	2.5	2.84		2.89
Tm	0.46	1.56	0.42	0.33	0.43	0.47		0.4
Yb	3	9.85	2.78	2.35	2.55	2.86		2.97
Lu	0.43	1.55	0.38	0.36	0.42	0.45		0.44
Eu/Eu*	1.065	0.72557	0.611158	0.741462	0.789767	0.668152		0.954244
LaCN	111.935	52.2581	91.9355	67.0968	59.0323	80.9677		35.1613
YbCN	14.3541	47.1292	13.3014	11.244	12.201	13.6842		14.2105
LaCN/YbCN	7.79817	1.10883	6.9117	5.96733	4.83833	5.91687		2.47431
CN=chondrite normalised (Boynton, 1984)
